# Supplementary material
Source: PubMed Central journal article supplement (PMC5695928)
Supplement: NIHMS878551-supplement-supplement_1.pdf [file NIHMS878551-supplement-supplement_1.pdf]

Table 1. Logistic regression analysis with adjustment for age due to significant age difference between cases and controls. Odds ratios indicate increased risk associated with a 1 unit change in the natural log of continuous variables.

| Characteristic                               | OR    | 95% CI         | p Value |
|----------------------------------------------|-------|----------------|---------|
| Age, mean years (SD)                         | 0.965 | 0.897 - 1.038  | 0.339   |
| Male gender, N (%)                           | 1.072 | 0.674 - 1.706  | 0.769   |
| Body-mass index (BMI) Kg/m <sup>2</sup>      | 3.728 | 1.460 - 9.516  | 0.006   |
| White Blood Cells (WBC), X1000               | 3.030 | 1.267 - 7.248  | 0.013   |
| Eosinophils (%)                              | 1.504 | 1.092 - 2.071  | 0.012   |
| CRP (mg/L)                                   | 1.199 | 0.956 - 1.504  | 0.117   |
| IgE (total, kU/L)                            | 1.422 | 1.200 - 1.686  | <0.001  |
| > one specific antibody over detection limit | 4.047 | 2.478 - 6.609  | <0.001  |
| Environmental variables                      |       |                |         |
| Saliva cotinine category*                    | 0.781 | 0.578 - 1.054  | 0.106   |
| Exhaled carbon monoxide (ppm)                | 1.043 | 0.895 - 1.216  | 0.588   |
| PM 1 level (mg/M <sup>3</sup> )              | 4.933 | 0.985 - 24.714 | 0.052   |
| PM 2.5 level (mg/M <sup>3</sup> )            | 3.879 | 0.915 - 16.443 | 0.066   |
| PM 4 level (mg/M <sup>3</sup> )              | 4.307 | 1.053 - 17.612 | 0.042   |
| PM 10 level (mg/M <sup>3</sup> )             | 6.389 | 1.340 - 30.468 | 0.020   |
| Indoor temp (F <sup>o</sup> )                | 0.988 | 0.940 - 1.038  | 0.635   |
| Outdoor temp (F <sup>o</sup> )               | 0.984 | 0.974 - 0.994  | 0.003   |
| Indoor relative humidity (%)                 | 0.974 | 0.958 - 0.990  | 0.002   |
| Outdoor relative humidity (%)                | 0.999 | 0.987 - 1.011  | 0.895   |
| Indoor carbon dioxide (ppm)                  | 1.000 | 1.000 - 1.001  | 0.101   |
| Indoor carbon monoxide (ppm)                 | 1.043 | 0.895 - 1.216  | 0.588   |
| Home heating, category**                     | 1.096 | 0.862 - 1.395  | 0.454   |

\*0=1-10ng/ml, 1=10-30ng/ml, 2=30-100ng/ml, 3=100-200ng/ml, 4=200-500ng/ml, 5=500-2,000ng/ml, 6= >2,000ng/ml

\*\* electric heat only=1, electric and gas=2, gas only=3, wood, kitchen stove, "other"=4
